# Supplementary material for: In Utero Exposure to Alcohol and Tobacco and Electroencephalogram Power During Childhood
Source: PubMed Central journal article supplement (PMC10770777; doi:10.1001/jamanetworkopen.2023.50528), 2024-01-05
Supplement: jamanetwopen-e2350528-s002.pdf [file jamanetwopen-e2350528-s002.pdf]

## Data Sharing Statement

Pini. In Utero Exposure to Alcohol and Tobacco and Electroencephalogram Power During Childhood. *JAMA Netw Open*. Published January 05, 2024.

doi:10.1001/jamanetworkopen.2023.50528

### Data

**Data available:** Yes

**Data types:** Deidentified participant data

**How to access data:** Nicolò Pini had full access to all the data presented in this study and takes responsibility for the integrity of the data and the accuracy of the data analysis. The data that support the findings of this study are available from the corresponding author, Nicolò Pini, upon reasonable request to be reviewed by the study team. Beginning date of data availability: with publication. Corresponding Author: Nicolò Pini, Department of Psychiatry, Columbia University Irving Medical Center, 1051 Riverside Drive, Room 4911C, New York, New York 10032, Email address: [np2600@cumc.columbia.edu](mailto:np2600@cumc.columbia.edu) and Telephone: +1 (646) 774-6239

**When available:** With publication

### Supporting Documents

**Document types:** None

### Additional Information

**Who can access the data:** Nicolò Pini had full access to all the data presented in this study and takes responsibility for the integrity of the data and the accuracy of the data analysis. The data that support the findings of this study are available from the corresponding author, Nicolò Pini, upon reasonable request to be reviewed by the study team. Beginning date of data availability: with publication. Corresponding Author: Nicolò Pini, Department of Psychiatry, Columbia University Irving Medical Center, 1051 Riverside Drive, Room 4911C, New York, New York 10032, Email address: [np2600@cumc.columbia.edu](mailto:np2600@cumc.columbia.edu) and Telephone: +1 (646) 774-6239

**Types of analyses:** Nicolò Pini had full access to all the data presented in this study and takes responsibility for the integrity of the data and the accuracy of the data analysis. The data that support the findings of this study are available from the corresponding author, Nicolò Pini, upon reasonable request to be reviewed by the study team. Beginning date of data availability: with publication. Corresponding Author: Nicolò Pini, Department of Psychiatry, Columbia University Irving Medical Center, 1051 Riverside Drive, Room 4911C, New York, New York 10032, Email address: [np2600@cumc.columbia.edu](mailto:np2600@cumc.columbia.edu) and Telephone: +1 (646) 774-6239

**Mechanisms of data availability:** Nicolò Pini had full access to all the data presented in this study and takes responsibility for the integrity of the data and the accuracy of the data analysis. The data that support the findings of this study are available from the corresponding author, Nicolò Pini, upon reasonable request to be reviewed by the study team. Beginning date of data availability: with publication. Corresponding Author: Nicolò Pini, Department of Psychiatry, Columbia University Irving Medical Center, 1051 Riverside Drive, Room 4911C, New York, New York 10032, Email address: [np2600@cumc.columbia.edu](mailto:np2600@cumc.columbia.edu) and Telephone: +1 (646) 774-6239

**Any additional restrictions:** Nicolò Pini had full access to all the data presented in this study and takes responsibility for the integrity of the data and the accuracy of the data analysis. The data that support the findings of this study are available from the corresponding author, Nicolò Pini, upon reasonable request to be reviewed by the study team. Beginning date of data availability: with publication. Corresponding Author: Nicolò Pini, Department of Psychiatry, Columbia University Irving Medical Center, 1051 Riverside Drive, Room 4911C, New York, New York 10032, Email address: [np2600@cumc.columbia.edu](mailto:np2600@cumc.columbia.edu) and Telephone: +1 (646) 774-6239
